# Supplementary material for: Approaches for the design of reduced toxicant emission cigarettes
Source: PubMed Central journal article supplement (PMC4125608; doi:10.1186/2193-1801-3-374), 2014-07-22
Supplement: 40064_2014_1094_MOESM1_ESM.pdf [file 40064_2014_1094_MOESM1_ESM.pdf]

## Supplementary Tables

Table S1. Design and specifications of experimental cigarettes used in the split-tipping study

| Test type | ISO tar specification (mg/cig) | Paper permeability (CU) | Tobacco rod characteristics       | Filter characteristics                                           | Filter ventilation | Target ventilation (%) | Split-gap paper porosity (CU) |
|-----------|--------------------------------|-------------------------|-----------------------------------|------------------------------------------------------------------|--------------------|------------------------|-------------------------------|
| Control   | 1                              | 62                      | 83 mm length,<br>24.6 mm circumf. | 27 mm CA<br>single segment<br>filter, 7%<br>triacetin<br>loading | OML                | 82                     | 1000                          |
| Split     |                                | 64                      |                                   |                                                                  | ST <sup>1</sup>    |                        |                               |
| Control   | 4                              | 57                      | USB blend A                       | 27 mm CA<br>single segment<br>filter, 7%<br>triacetin<br>loading | OML                | 62                     | 500                           |
| Split     |                                | 58                      |                                   |                                                                  | ST <sup>1</sup>    |                        |                               |
| Control   | 7                              | 60                      | 83 mm length,<br>24.6 mm circumf. | 27 mm CA<br>single segment<br>filter, 7%<br>triacetin<br>loading | OML                | 45                     | 240                           |
| Split     |                                | 54                      |                                   |                                                                  | ST <sup>1</sup>    |                        |                               |
| Control   | 10                             | 56                      | USB blend B                       | 27 mm CA<br>single segment<br>filter, 7%<br>triacetin<br>loading | OML                | 28                     | 110                           |
| Split     |                                | 65                      |                                   |                                                                  | ST <sup>1</sup>    |                        |                               |

Abbreviations: CA, cellulose acetate; CU, CORESTA units ; OML, on-machine laser; ST, split-tipping ; USB, US style tobacco blend.

<sup>1</sup> Split-tipping with porous paper split-gap (adjusted to target ventilation with OML).

Table S2. Design and specifications of experimental cigarettes used in the circumference study

| Cigarette code               | K111    | D111    | S111    | K711    | D711    | S711    |
|------------------------------|---------|---------|---------|---------|---------|---------|
| <i>Tobacco</i>               |         |         |         |         |         |         |
| Blend style                  | MFCV    | MFCV    | MFCV    | MFCV    | MFCV    | MFCV    |
| Blend technology             | TSS     | TSS     | TSS     | TSS     | TSS     | TSS     |
| Technology inclusion (%)     | 20      | 20      | 20      | 20      | 20      | 20      |
| Top flavour addition (w/w%)  | -       | -       | -       | -       | -       | -       |
| Rod length (mm)              | 56      | 56      | 56      | 56      | 56      | 56      |
| Density (mg/cc)              | 211     | 215     | 242     | 235     | 240     | 232     |
| Blend weight (mg)            | 540     | 397     | 297     | 584     | 445     | 301     |
| Moisture (%)                 | 12.7    | 12.8    | 12.5    | 13.5    | 13.1    | 13.2    |
| <i>Filter</i>                |         |         |         |         |         |         |
| Format                       | Mono    | Mono    | Mono    | Mono    | Mono    | Mono    |
| Filter length (mm)           | 27      | 27      | 27      | 27      | 27      | 27      |
| Mouth end segment            | 27mm CA | 27mm CA | 27mm CA | 27mm CA | 27mm CA | 27mm CA |
| Middle segment               | -       | -       | -       | -       | -       | -       |
| Tobacco end segment          | -       | -       | -       | -       | -       | -       |
| Plasticiser type             | TA      | TA      | TA      | TA      | TA      | TA      |
| Filter PD (mmWG)             | 110     | 142     | 182     | 84      | 104     | 145     |
| Filter ventilation (%)       | 79      | 84      | 82      | 42      | 41      | 21      |
| Split tipping                | No      | No      | No      | No      | No      | No      |
| Split tip vent zone/gap (mm) | -       | -       | -       | -       | -       | -       |
| OML                          | Yes     | Yes     | Yes     | Yes     | Yes     | Yes     |

|                         |      |      |      |      |      |      |
|-------------------------|------|------|------|------|------|------|
| <i>Cigarette</i>        |      |      |      |      |      |      |
| Total length (mm)       | 83   | 83   | 83   | 83   | 83   | 83   |
| Circumference (mm)      | 24.6 | 21.0 | 17.0 | 24.6 | 21.0 | 17.0 |
| Total weight (mg)       | 791  | 617  | 454  | 835  | 654  | 454  |
| Paper permeability (CU) | 50   | 50   | 25   | 50   | 50   | 25   |
| Paper citrate level (%) | 1    | 1    | 1    | 1    | 1    | 1    |
| ISO NFDPM target (mg)   | 1    | 1    | 1    | 7    | 7    | 7    |

Abbreviations: CA, cellulose acetate; CU, CORESTA units; NFDPM, nicotine-free dry particulate matter.



|                         |      |      |      |      |      |           |      |           |      |           |
|-------------------------|------|------|------|------|------|-----------|------|-----------|------|-----------|
| <i>Cigarette</i>        |      |      |      |      |      |           |      |           |      |           |
| Total length (mm)       | 83   | 83   | 83   | 83   | 83   | 83        | 83   | 83        | 83   | 83        |
| Circumference (mm)      | 24.6 | 21.0 | 17.0 | 24.6 | 24.6 | 24.6      | 21.0 | 21.0      | 17.0 | 17.0      |
| Total weight (mg)       | 943  | 702  | 474  | 834  | 875  | 874       | 677  | 665       | 469  | 452       |
| Paper permeability (CU) | 75   | 75   | 50   | 50   | 25   | 5 (+EP50) | 25   | 5 (+EP50) | 25   | 5 (+EP50) |
| Paper citrate level (%) | 1    | 1    | 0.6  | 1    | 0.6  | 3         | 0.6  | 1         | 1    | 3         |
| ISO NFDPM target (mg)   | 7    | 7    | 7    | 7    | 7    | 7         | 7    | 7         | 7    | 7         |

Abbreviations: CA, cellulose acetate; CU, CORESTA units; NFDPM, nicotine-free dry particulate matter.

Table S4. Design and specifications of the RTP prototype and commercial comparator cigarettes

| Cigarette Code               | CC7     | RTP2               |
|------------------------------|---------|--------------------|
| <i>Tobacco</i>               |         |                    |
| Blend style                  | USB     | MFCV               |
| Blend technology             | -       | BTT/TSS            |
| Technology inclusion (%)     | -       | 50/15              |
| Top flavour addition (w/w%)  | -       | 0.8                |
| Rod length (mm)              | 56      | 46                 |
| Density (mg/ml)              | 231     | 312                |
| Blend weight (mg)            | 598     | 490                |
| Moisture (%)                 | 13.3    | 12.6               |
| <i>Filter</i>                |         |                    |
| Format                       | Mono    | Triple             |
| Filter length (mm)           | 27      | 37                 |
| Mouth end segment            | 27mm CA | 7mm CA             |
| Middle segment               | -       | 10mm CA + 20mg AFR |
| Tobacco end segment          | -       | 20mm CA + 50mg HAC |
| Filter PD (mmWG)             | 87      | 113                |
| Filter ventilation (%)       | 33      | 35                 |
| Split tipping                | No      | Yes                |
| Split tip vent zone/gap (mm) | -       | 10                 |
| OML                          | Yes     | Yes                |

|                         |      |      |
|-------------------------|------|------|
| <i>Cigarette</i>        |      |      |
| Total length (mm)       | 83   | 83   |
| Circumference (mm)      | 24.6 | 21.0 |
| Total weight (mg)       | 830  | 830  |
| Paper permeability (CU) | 75   | 50   |
| Paper citrate level (%) | 2    | 1    |
| End stability (mg/end)  | 1.7  | 4.7  |
| ISO NFDPM target (mg)   | 7    | 7    |

Abbreviations: CA, cellulose acetate; CU, CORESTA units; NFDPM, nicotine-free dry particulate matter.

Table S5. Analytical methods and reporting limits for analysis of blend analytes, and mainstream and sidestream smoke toxicants

| Analysis approach            | Mainstream smoke         |                                      | Mainstream smoke      |                                      | Sidestream smoke      |                                      | Tobacco blend            |                                      |
|------------------------------|--------------------------|--------------------------------------|-----------------------|--------------------------------------|-----------------------|--------------------------------------|--------------------------|--------------------------------------|
| Analytical lab               | British American Tobacco |                                      | Labstat International |                                      | Labstat International |                                      | British American Tobacco |                                      |
| Functional group and analyte | BAT method*              | Reporting limit <sup>a</sup> (Units) | Health Canada method  | Reporting limit <sup>b</sup> (Units) | Health Canada method  | Reporting limit <sup>b</sup> (units) | BAT method               | Reporting limit <sup>a</sup> (units) |
| Ammonia                      | S002N (AMD-1601)         | 0.80 µg/cig                          | T-101                 | 2.44 µg/cig                          | T-201                 | 213 µg/cig                           |                          |                                      |
| <b>Aromatic Amines</b>       | S064U (AMD-1642)         |                                      | T-102                 |                                      | T-202                 |                                      |                          |                                      |
| 1-Aminonaphthalene           |                          | 0.45 ng/cig                          |                       | 0.425 ng/cig                         |                       | 2.13 ng/cig                          |                          |                                      |
| 2-Aminonaphthalene           |                          | 0.45 ng/cig                          |                       | 0.552 ng/cig                         |                       | 2.76 ng/cig                          |                          |                                      |
| 3-Aminobiphenyl              |                          | 0.09 ng/cig                          |                       | 0.069 ng/cig                         |                       | 0.34 ng/cig                          |                          |                                      |
| 4-Aminobiphenyl              |                          | 0.09 ng/cig                          |                       | 0.069 ng/cig                         |                       | 0.34 ng/cig                          |                          |                                      |
| Benzo[a]pyrene               | S015U (AMD-1609)         | 1.25 ng/cig                          | T-103                 | 0.704 ng/cig                         | T-203A                | 3.35 ng/cig                          | T115U (AMD-2140)         | 0.25 ng/g                            |
| <b>Carbonyls</b>             | S017U (AMD-1611)         |                                      | T-104                 |                                      | T-204                 |                                      |                          |                                      |
| Formaldehyde                 |                          | 0.85 µg/cig                          |                       | 1.20 µg/cig                          |                       | 2.11 µg/cig                          |                          |                                      |
| Acetaldehyde                 |                          | 1.15 µg/cig                          |                       | 3.24 µg/cig                          |                       | 5.68 µg/cig                          |                          |                                      |
| Acetone                      |                          | 1.45 µg/cig                          |                       | 2.82 µg/cig                          |                       | 4.94 µg/cig                          |                          |                                      |
| Acrolein                     |                          | 0.95 µg/cig                          |                       | 2.38 µg/cig                          |                       | 4.16 µg/cig                          |                          |                                      |
| Propionaldehyde              |                          | 0.95 µg/cig                          |                       | 3.34 µg/cig                          |                       | 5.84 µg/cig                          |                          |                                      |
| Crotonaldehyde               |                          | 1.10 µg/cig                          |                       | 3.29 µg/cig                          |                       | 5.76 µg/cig                          |                          |                                      |
| Methyl Ethyl Ketone          |                          | 1.10 µg/cig                          |                       | 3.66 µg/cig                          |                       | 6.41 µg/cig                          |                          |                                      |
| Butyraldehyde                |                          | 1.15 µg/cig                          |                       | 2.71 µg/cig                          |                       | 4.74 µg/cig                          |                          |                                      |
| <b>Hydrogen Cyanide</b>      | S018U (AMD-1612)         | 5.60 µg/cig                          | T-107                 | 1.75 µg/cig                          | T-205                 | 13.1 µg/cig                          |                          |                                      |
| <b>Metals</b>                | S066N (AMD-1643)         |                                      | T-109                 |                                      | T-207                 |                                      | AMD-1644                 |                                      |



|                                                         |                     |              |       |              |       |             |          |             |
|---------------------------------------------------------|---------------------|--------------|-------|--------------|-------|-------------|----------|-------------|
| Cadmium                                                 |                     | 1.93 ng/cig  |       | 1.59 ng/cig  |       | 13.4 ng/cig |          | 0.02 µg/g   |
| Lead                                                    |                     | 12.03 ng/cig |       | 12.8 ng/cig  |       | 115 ng/cig  |          | 0.02 µg/g   |
| Chromium                                                |                     | 1.17 ng/cig  |       | 19.8 ng/cig  |       | 103 ng/cig  |          | 0.04 µg/g   |
| Nickel                                                  |                     | 1.99 ng/cig  |       | 21.6 ng/cig  |       | 118 ng/cig  |          | 0.08 µg/g   |
| Arsenic                                                 |                     | 0.97 ng/cig  |       | 3.75 ng/cig  |       | 37.7 ng/cig |          | 0.02 µg/g   |
| Selenium                                                |                     | 4.10 ng/cig  |       | 7.37 ng/cig  |       | 58.4 ng/cig |          | 0.02 µg/g   |
| Mercury                                                 | S066N<br>(AMD-1643) | 0.13 ng/cig  | T-108 | 1.43 ng/cig  | T-206 | 6.00 ng/cig | AMD-1644 | 0.13 µg/g   |
| <b>Oxides of Nitrogen</b>                               |                     |              | T-110 |              | T-208 |             |          |             |
| NO                                                      | S185N<br>(AMD-1669) | 40 µg/cig    |       | 2.70 µg/cig  |       | 186 µg/cig  |          |             |
| NOx                                                     |                     |              |       | 7.52 µg/cig  |       | 179 µg/cig  |          |             |
| <b>Tobacco Specific Nitrosamines</b>                    | S168U<br>(AMD-1664) |              | T-111 |              | T-209 |             | AMD-1646 |             |
| N-Nitrosornicotine (NNN)                                |                     | 0.18 ng/cig  |       | 4.95 ng/cig  |       | 6.19 ng/cig |          | 0.0018 µg/g |
| N-Nitrosoanatabine (NAT)                                |                     | 0.18 ng/cig  |       | 6.25 ng/cig  |       | 7.81 ng/cig |          | 0.0018 µg/g |
| N-Nitrosoanabasine (NAB)                                |                     | 0.09 ng/cig  |       | 2.11 ng/cig  |       | 2.64 ng/cig |          | 0.009 µg/g  |
| 4-(N-nitrosomethylamino)-1-(3-pyridyl)-1-butanone (NNK) |                     | 0.18 ng/cig  |       | 12.4 ng/cig  |       | 15.5 ng/cig |          | 0.0018 µg/g |
| <b>(Semi-Volatiles)</b>                                 | S020U<br>(AMD-1614) |              | T-112 |              | T-210 |             |          |             |
| Pyridine                                                |                     | 0.80 µg/cig  |       | 0.791 µg/cig |       | 9.89 µg/cig |          |             |
| Quinoline                                               |                     | 0.08 µg/cig  |       | 0.024 µg/cig |       | 0.30 µg/cig |          |             |
| <b>Phenols</b>                                          | S019U<br>(AMD-1613) |              | T-114 |              | T-211 |             |          |             |
| Hydroquinone                                            |                     | 3.20 µg/cig  |       | 3.09 µg/cig  |       | 14.1 µg/cig |          |             |
| Resorcinol                                              |                     | 0.40 µg/cig  |       | 1.74 µg/cig  |       | 5.42 µg/cig |          |             |
| Catechol                                                |                     | 4.0 µg/cig   |       | 10.5 µg/cig  |       | 36.4 µg/cig |          |             |
| Phenol                                                  |                     | 1.60 µg/cig  |       | 2.08 µg/cig  |       | 13.8 µg/cig |          |             |
| m+p Cresols                                             |                     | 0.40 µg/cig  |       | 1.53 µg/cig  |       | 4.29 µg/cig |          |             |

|                           |                     |             |       |              |                    |              |          |                  |
|---------------------------|---------------------|-------------|-------|--------------|--------------------|--------------|----------|------------------|
| o-Cresol                  |                     | 0.40 µg/cig |       | 1.07 µg/cig  |                    | 6.61 µg/cig  |          |                  |
| NFDPM                     | S014U<br>(AMD-1608) | 1 mg/cig    | T-115 | 0.237 mg/cig | T-212              | 0.593 mg/cig |          |                  |
| Nicotine                  |                     | 0.10 mg/cig |       | 0.004 mg/cig |                    | 0.011 mg/cig | AMD-1615 | 4.0 mg/g (0.4%)  |
| TPM                       |                     | 1 mg/cig    |       | 0.200 mg/cig |                    | 0.500 mg/cig |          |                  |
| <b>Selected Volatiles</b> | S094N<br>(AMD-1673) |             | T-116 |              | T-213              |              |          |                  |
| 1,3-Butadiene             |                     | 2.02 µg/cig |       | 0.97 µg/cig  |                    | 26.4 µg/cig  |          |                  |
| Isoprene                  |                     | 8.25 µg/cig |       | 8.86 µg/cig  |                    | 12.0 µg/cig  |          |                  |
| Acrylonitrile             |                     | 0.33 µg/cig |       | 0.94 µg/cig  |                    | 23.5 µg/cig  |          |                  |
| Benzene                   |                     | 1.42 µg/cig |       | 4.63 µg/cig  |                    | 9.74 µg/cig  |          |                  |
| Toluene                   |                     | 2.10 µg/cig |       | 8.32 µg/cig  |                    | 16.0 µg/cig  |          |                  |
| Styrene                   | S020U<br>(AMD-1614) | 0.80 µg/cig | T-112 | 0.56 µg/cig  |                    | 14.8 µg/cig  |          |                  |
| CO                        | S010U<br>(AMD-1607) |             | T-115 | 0.223 mg/cig | T-214              | 19.1 mg/cig  |          |                  |
| CO <sub>2</sub>           |                     |             |       |              | T-214 <sup>b</sup> | 30.0 mg/cig  |          |                  |
| <b>Sugars</b>             |                     |             |       |              |                    |              | AMD-1615 |                  |
| Total sugars              |                     |             |       |              |                    |              |          | 25 mg/g (2.5%)   |
| Reducing sugars           |                     |             |       |              |                    |              |          | 25 mg/g (2.5%)   |
| <b>Polyphenols</b>        |                     |             |       |              |                    |              | AMD-1600 |                  |
| Caffeic acid              |                     |             |       |              |                    |              |          | 0.03 mg/g        |
| Chlorogenic acid          |                     |             |       |              |                    |              |          | 1.0 mg/g         |
| Rutin                     |                     |             |       |              |                    |              |          | 0.5 mg/g         |
| Scopoletin                |                     |             |       |              |                    |              |          | 0.05 mg/g        |
| Total nitrogen            |                     |             |       |              |                    |              | AMD-1647 | 6.5 mg/g (0.65%) |
| Protein nitrogen          |                     |             |       |              |                    |              | AMD-1648 | 0.11% (WWB)      |

Table S6. Blend chemistry of experimental cigarettes

| Component        | Units (dwb) | K111/D111/<br>S111 | K711/D711/<br>S711 | HAC loading<br>cigarettes | RTP2 Blend | CC7 Blend |
|------------------|-------------|--------------------|--------------------|---------------------------|------------|-----------|
| Nicotine         | %           | 2.4                | 2.2                | 2.2                       | 2.1        | 2.1       |
| Reducing sugars  | %           | 8.8                | 7.2                | 7.2                       | 10.2       | 7.8       |
| Total sugars     | %           | 8.9                | 7.3                | 7.3                       | 10.9       | 8.2       |
| Moisture content | %           | 6.8                | 6.8                | 6.8                       | 12.6       | 13.2      |
| Total nitrogen   | %           | 2.3                | 2.3                | 2.3                       | 1.9        | 3.1       |
| Protein nitrogen | %           | 0.91               | 0.87               | 0.87                      | 0.53       | 1.19      |
| Caffeic acid     | mg/g        | 0.18               | 0.15               | 0.15                      | 0.084      | 0.133     |
| Chlorogenic acid | mg/g        | 6.6                | 5.71               | 5.71                      | 6.8        | 4.44      |
| Rutin            | mg/g        | 5.36               | 4.44               | 4.44                      | 2.2        | 3.55      |
| Scopoletin       | mg/g        | 0.41               | 0.33               | 0.33                      | 0.13       | 0.16      |
| Chromium         | µg/g        | 0.78               | 0.76               | 0.76                      | 1.67       | 2.1       |
| Nickel           | µg/g        | 1.15               | 0.87               | 0.87                      | 1.43       | 2.16      |
| Selenium         | µg/g        | 0.12               | 0.11               | 0.11                      | 0.19       | 0.1       |
| Arsenic          | µg/g        | 0.11               | 0.11               | 0.11                      | 0.14       | 0.2       |
| Cadmium          | µg/g        | 0.68               | 0.65               | 0.65                      | 1.03       | 0.96      |
| Lead             | µg/g        | 0.36               | 0.34               | 0.34                      | 0.32       | 0.66      |
| Mercury          | µg/g        | <0.13              | <0.13              | <0.13                     | NA         | NA        |
| NAB              | µg/g        | 0.02               | 0.02               | 0.02                      | 0.018      | 0.044     |
| NAT              | µg/g        | 0.28               | 0.33               | 0.33                      | 0.416      | 0.952     |
| NNK              | µg/g        | 0.10               | 0.13               | 0.13                      | 0.141      | 0.283     |
| NNN              | µg/g        | 0.18               | 0.22               | 0.22                      | 0.189      | 1.636     |
| Benzo[a]pyrene   | ng/g        | 75.6               | 76.1               | 76.1                      | 13.8       | 52        |
